# Supplementary material
Source: publisher figshare collection journal article supplement (https://gsapubs.figshare.com/ndownloader/files/22744988)
Supplement: Supplementary file 1 [file 22744988]

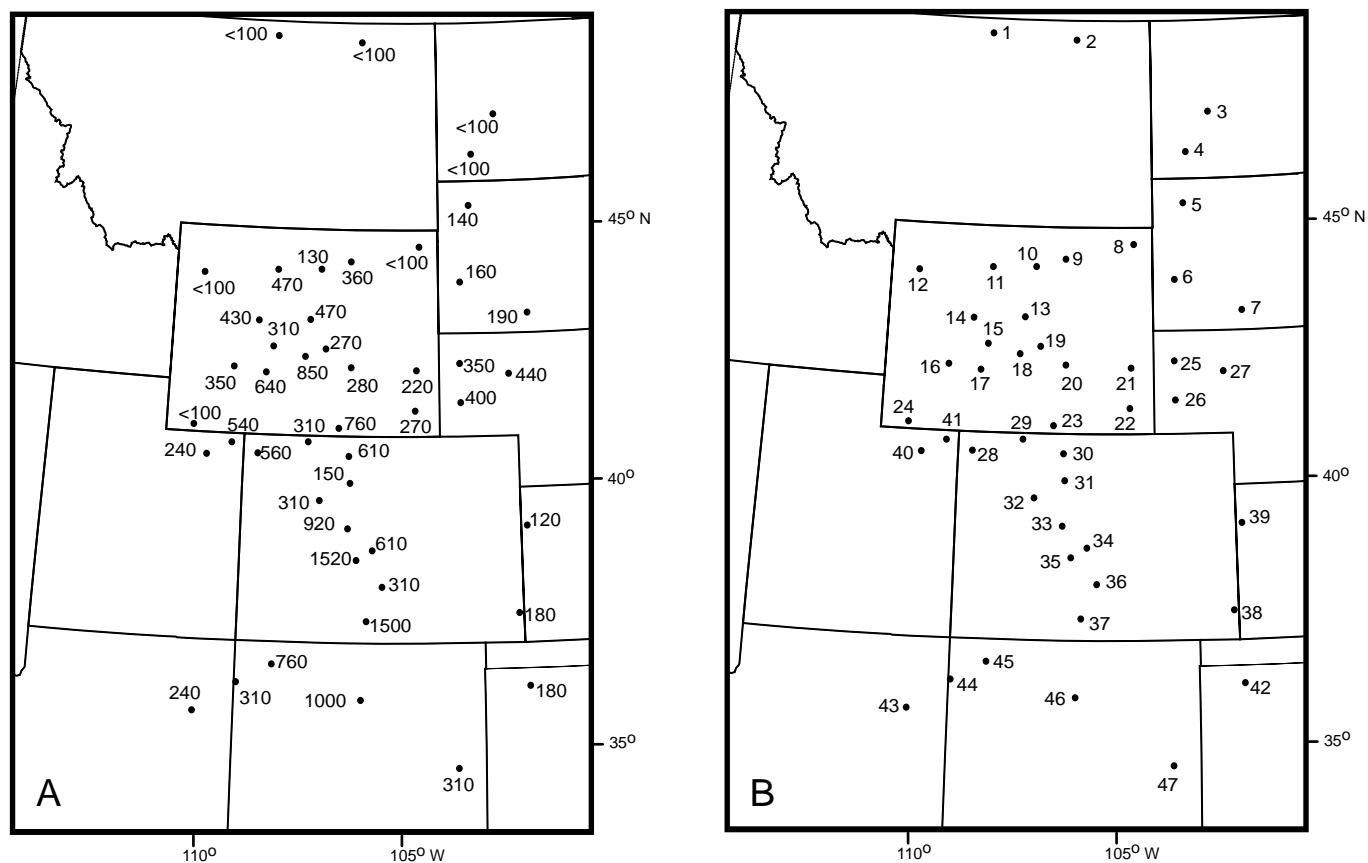

DR1. Thickness data of post-Laramide basin fill remnants. (A) Thicknesses in meters, (B) Numbers coincide with reference information in Table DR1.

Table DR1. Information for thickness calculations of post-Laramide basin fill remnants.

| #  | State | Location/basin                                                        | Unit                         | Thickness (m) |       | Source                                                     |
|----|-------|-----------------------------------------------------------------------|------------------------------|---------------|-------|------------------------------------------------------------|
|    |       |                                                                       |                              | by unit       | Total |                                                            |
| 1  | MT    | North central - Northeast Montana                                     | Flaxville Gravel             | 30            | <100  | Howard, 1960                                               |
| 2  | MT    | North central - Northeast Montana                                     | Flaxville Gravel             | 30            | <100  | Howard, 1960                                               |
| 3  | ND    | Killdeer Mountains, Dunn County                                       | White River Gp./Killdeer Fm. | 80            | <100  | Stone, 1973                                                |
| 4  | ND    | Little Badlands, Stark County                                         | White River Gp./Killdeer Fm. | 70            | <100  | Stone, 1973                                                |
| 5  | SD    | Slim Buttes, NW South Dakota                                          | White River & Arikaree Gps.  | 140           | 140   | Lillegraven, 1970                                          |
| 6  | SD    | Black Hills                                                           | Ogallala Formation           | 50            | 160   | Robinson et al., 1964                                      |
|    |       |                                                                       | Arikaree Group               | 60            |       |                                                            |
|    |       |                                                                       | White River Group            | 50            |       |                                                            |
| 7  | SD    | Badlands, SW South Dakota                                             | White River (Chadron Mbr.)   | 55            | 190   | Martin, 1987                                               |
|    |       |                                                                       | White River (Brule Mbr.)     | 100           |       |                                                            |
|    |       |                                                                       | Sharps (Arikaree equivalent) | 30            |       |                                                            |
| 8  | WY    | NW Black Hills                                                        | White River Group            | 73            | <100  | Flanagan, 1990; Staatz, 1983;<br>Robinson et al., 1964     |
|    |       |                                                                       | Ogallala Formation           | 15            |       |                                                            |
| 9  | WY    | Reconstruction of Oligocene-Miocene units over the Powder River Basin |                              |               | 360   | McKenna and Love, 1972                                     |
| 10 | WY    | Darton's Bluff, Bighorn Range                                         | unnamed Miocene rocks        | 43            | 130   | McKenna and Love, 1972;<br>Kochel and Ritter, 1982         |
|    |       |                                                                       | White River Group            | 91            |       |                                                            |
| 11 | WY    | Reconstruction of Oligocene units over the Bighorn Basin              |                              |               | 470   | McKenna and Love, 1972                                     |
| 12 | WY    | South of Yellowstone Park                                             | White River Group            | 20-30         | <100  | Love et al., 1976                                          |
| 13 | WY    | South end of Bighorn Range                                            | Split Rock Formation         | 259           | 470   | Love, 1970                                                 |
|    |       |                                                                       | White River Group            | 213           |       |                                                            |
| 14 | WY    | Reconstruction of Oligocene-Miocene units over the Wind River Basin   |                              |               | 430   | Nuccio and Finn, 1994                                      |
| 15 | WY    | Beaver Rim, Wind River Basin                                          | White River Group            | 244-305       | 310   | Seeland, 1985; Van Houten, 1964;<br>Emry, 1973; Love, 1970 |
|    |       |                                                                       | Miocene/Split Rock Fm.       | 30            |       |                                                            |
| 16 | WY    | Southern Wind River Range                                             | Split Rock Formation         | 229           | 350   | Steidtmann and Middleton, 1986                             |
|    |       |                                                                       | Circle Bar/Leckie beds       | 122           |       |                                                            |
| 17 | WY    | Northern Great Divide Basin                                           | Split Rock Formation         | 457           | 640   | Love, 1970                                                 |
|    |       |                                                                       | White River Group            | 183           |       |                                                            |
| 18 | WY    | Granite Mountains                                                     | Moonstone Formation          | 274           | 850   | Love, 1970                                                 |
|    |       |                                                                       | Kortes Formation             | 396           |       |                                                            |
|    |       |                                                                       | White River Group            | 180           |       |                                                            |
| 19 | WY    | Flagstaff Rim, Powder River Basin                                     | Miocene/Split Rock Fm.       | 40            | 270   | Emry, 1973; Love, 1970                                     |
|    |       |                                                                       | Group                        | 229           |       |                                                            |
| 20 | WY    | Bates Hole, Shirley Basin                                             | White River Group            | 229           | 280   | Evanoff, 1990; Denson and Harshman, 1969<br>Harshman, 1972 |
|    |       |                                                                       | Split Rock Formation         | 53            |       |                                                            |
| 21 | WY    | Pine Ridge, Powder River Basin                                        | White River Group            | 216           | 220   | Evanoff, 1990                                              |
| 22 | WY    | Cheyenne Tablelands near WY-NE border                                 | White River Group            | 199           | 270   | Cooley and Crist, 1981                                     |
|    |       |                                                                       | Arikaree Group               | 57            |       |                                                            |
|    |       |                                                                       | Ogallala Formation           | 9             |       |                                                            |
| 23 | WY    | Saratoga Basin                                                        | Browns Park Formation        | 762           | 760   | Montagne, 1991                                             |
| 24 | WY    | Green River Basin                                                     | Bishop Conglomerate          | 60-75         | <100  | Hansen, 1986                                               |
| 25 | NE    | Western Nebraska,<br>South of North Platte River                      | Ogallala Formation           | 15            | 350   | Swinehart et al., 1985                                     |
|    |       |                                                                       | Arikaree Group               | 123           |       |                                                            |
|    |       |                                                                       | White River (Brule Mbr.)     | 200           |       |                                                            |
|    |       |                                                                       | White River (Chadron Mbr.)   | 15            |       |                                                            |
| 26 | NE    | Western Nebraska,<br>North of North Platte River                      | Ogallala Formation           | 16            | 400   | Swinehart et al., 1985                                     |
|    |       |                                                                       | Arikaree Group               | 138           |       |                                                            |
|    |       |                                                                       | White River (Brule Mbr.)     | 215           |       |                                                            |
|    |       |                                                                       | White River (Chadron Mbr.)   | 31            |       |                                                            |

| #  | State | Location/basin                               | Unit                                                                                           | Thickness (m)          |             | Source                      |
|----|-------|----------------------------------------------|------------------------------------------------------------------------------------------------|------------------------|-------------|-----------------------------|
|    |       |                                              |                                                                                                | by unit                | Total       |                             |
| 27 | NE    | Cheyenne Tablelands,<br>western Great Plains | Ogallala Formation<br>Arikaree Group<br>White River (Brule Mbr.)<br>White River (Chadron Mbr.) | 193<br>85<br>146<br>15 | <b>440</b>  | Swinehart et al., 1985      |
| 28 | CO    | Maybell area                                 | Browns Park Formation                                                                          | 555                    | <b>560</b>  | Honey and Izett, 1988       |
| 29 | CO    | Elkhead Mountains, CO-WY border              | Browns Park Formation                                                                          | 192-311                | <b>310</b>  | Buffler, 1967               |
| 30 | CO    | North Park, Basin                            | North Park Formation                                                                           | 610                    | <b>610</b>  | Hail and Lewis, 1960        |
| 31 | CO    | Williams Fork Valley                         | Troublesome Formation                                                                          | 152                    | <b>150</b>  | Tweto et al., 1978          |
| 32 | CO    | State Bridge, CO                             | Browns Park Formation                                                                          | 305                    | <b>310</b>  | Tweto et al., 1978          |
| 33 | CO    | Southwest of Leadville, CO                   | Dry Union Formation                                                                            | 915                    | <b>920</b>  | Tweto et al., 1978          |
| 34 | CO    | South Park Basin                             | Antero & Wagon Tongue Fms.                                                                     | 610                    | <b>610</b>  | Gries et al., 1992          |
| 35 | CO    | Salida, Arkansas River valley                | Dry Union Formation                                                                            | 1524                   | <b>1520</b> | Scott et al., 1978          |
| 36 | CO    | Wet Mountain valley                          | Santa Fe Group (?)                                                                             | 305                    | <b>310</b>  | Scott and Taylor, 1975      |
| 37 | CO    | Rio Grande Rift                              | Santa Fe Group                                                                                 | 1500                   | <b>1500</b> | Chapin and Cather, 1994     |
| 38 | CO    | Pawnee Butte, w. Great Plains                | White River Group                                                                              | 183                    | <b>180</b>  | Gries et al., 1992          |
| 39 | KS    | U.S. highway 40, CO/KS border                | Ogallala Formation                                                                             | 120                    | <b>120</b>  | Sharps, 1980                |
| 40 | UT    | south flank of Uinta Mountains               | Bishop Conglomerate                                                                            | 244                    | <b>240</b>  | Hansen, 1986                |
| 41 | UT    | Browns Park                                  | Browns Park Formation<br>Bishop Conglomerate                                                   | 490<br>45              | <b>540</b>  | Hansen, 1986                |
| 42 | TX    | Western Great Plains                         | Ogallala Formation                                                                             | 180                    | <b>180</b>  | Gustavson and Winkler, 1988 |
| 43 | AZ    | Northeastern Arizona                         | Bidahochi Formation                                                                            | 240                    | <b>240</b>  | Scarborough, 1989           |
| 44 | AZ    | Chuska Mountains                             | Chuska Sandstone                                                                               | 305                    | <b>310</b>  | Nations et al., 1985        |
| 45 | NM    | Reconstructed over San Juan Basin            |                                                                                                |                        | <b>760</b>  | Fassett, 1985               |
| 46 | NM    | Rio Grande Rift                              | Pliocene-Miocene rocks                                                                         | 1000                   | <b>1000</b> | Chapin and Cather, 1994     |
| 47 | NM    | Western Great Plains                         | Ogallala Formation                                                                             | 310                    | <b>310</b>  | Hawley, 1993                |

**Table DR2. Stratigraphic units used in selecting maximum elevations of youngest basin fill.**

| State | Reference                  | Map Symbol                                                                              | Map Units                                                                                                                                                                                                                                                                                                                                          |
|-------|----------------------------|-----------------------------------------------------------------------------------------|----------------------------------------------------------------------------------------------------------------------------------------------------------------------------------------------------------------------------------------------------------------------------------------------------------------------------------------------------|
| AZ    | Hirschberg and Pitts, 2000 | Tb<br>Tby<br>Tsy<br>Tso                                                                 | Basaltic rocks Pliocene to late Miocene<br>Basaltic rocks late to middle Miocene<br>Pliocene to mid Miocene (includes Bidahochi Formation)<br>Sedimentary rocks Oligocene to Eocene (includes Chuska Sandstone)                                                                                                                                    |
| CO    | Green, 1992                | Tgv<br>To<br>Tbb<br>Tbp<br>Tnp<br>Ta<br>Tlp<br>Td<br>Ts<br>Tt<br>Tos<br>Twr             | Gravels on old erosion surfaces on Front Range/Never Summer Ranges<br>Ogallala Formation<br>Basalt flows (3.5 - 26 Ma)<br>Browns Park Formation<br>North Park Formation<br>Arikaree Formation<br>Los Pinos Formation<br>Dry Union Formation<br>Santa Fe Formation<br>Troublesome Formation<br>Oligocene Sedimentary Rocks<br>White River Formation |
| MT    | Raines and Johnson, 1996   | Tf<br>Ta<br>Twr                                                                         | Flaxville Gravel<br>Arikaree Formation<br>White River Formation                                                                                                                                                                                                                                                                                    |
| NM    | Green and Jones, 1997      | Qa/QTs<br>Qe/QTs<br>Qoa/To<br>Qp/QTs<br>Qp/Tsf<br>QTs<br>QTsf<br>Tc<br>To<br>Tsf<br>Tus | Santa Fe Group<br>Santa Fe Group<br>Ogallala Formation<br>Santa Fe Group<br>Santa Fe Group<br>Santa Fe Group<br>Santa Fe Group<br>Chuska Sandstone<br>Ogallala Formation<br>Santa Fe Group<br>Upper Tertiary Sedimentary units (includes Bidahochi Formation)                                                                                      |
| UT    | Hintze et al., 2000        | Tpb<br>Tmb<br>T5<br>T4<br>Ti                                                            | Basalt flows of Southwestern Utah (Pliocene)<br>Basalt flows of Southwestern Utah (Miocene)<br>Browns Park Formation<br>Bishop Conglomerate<br>Laccolith intrusions                                                                                                                                                                                |

| State                        | Reference                  | Map Symbol | Map Units                                            |
|------------------------------|----------------------------|------------|------------------------------------------------------|
| WY                           | Green and Drouillard, 1994 | Tmu        | Upper Miocene rocks                                  |
|                              |                            | Tsl        | Salt Lake Formation                                  |
|                              |                            | Tm         | Miocene rocks                                        |
|                              |                            | Tml        | Lower Miocene rocks, Bighorn Mountains               |
|                              |                            | Tmo        | Lower Miocene and Upper Oligocene rocks              |
|                              |                            | Tbi        | Bishop Conglomerate                                  |
|                              |                            | Twr        | White River Formation                                |
|                              |                            | Twru       | White River Formation, upper conglomerate Member     |
|                              |                            | Twrb       | White River Formation - Brule Member                 |
|                              |                            | Twrc       | White River Formation - Chadron Member               |
|                              |                            | Tu         | Post-Eocene Sandstone and Conglomerate               |
|                              |                            | Tr         | Red Conglomerate on top of Hoback and Wyoming Ranges |
| KS, OK,<br>ND, NE,<br>SD, TX | Schruben et al., 1994      | Tpc        | Pliocene continental deposits                        |
|                              |                            | Tmc        | Miocene continental deposits                         |
|                              |                            | Toc        | Oligocene continental deposits                       |

**DR3. Upper limits on maximum elevation of reconstructed surface from proxy data and timing of incision data. (A) Elevations in meters, First time value is before incision began, second time value is after incision was initiated, (B) Numbers/letters coincide with reference information in Tables below.**

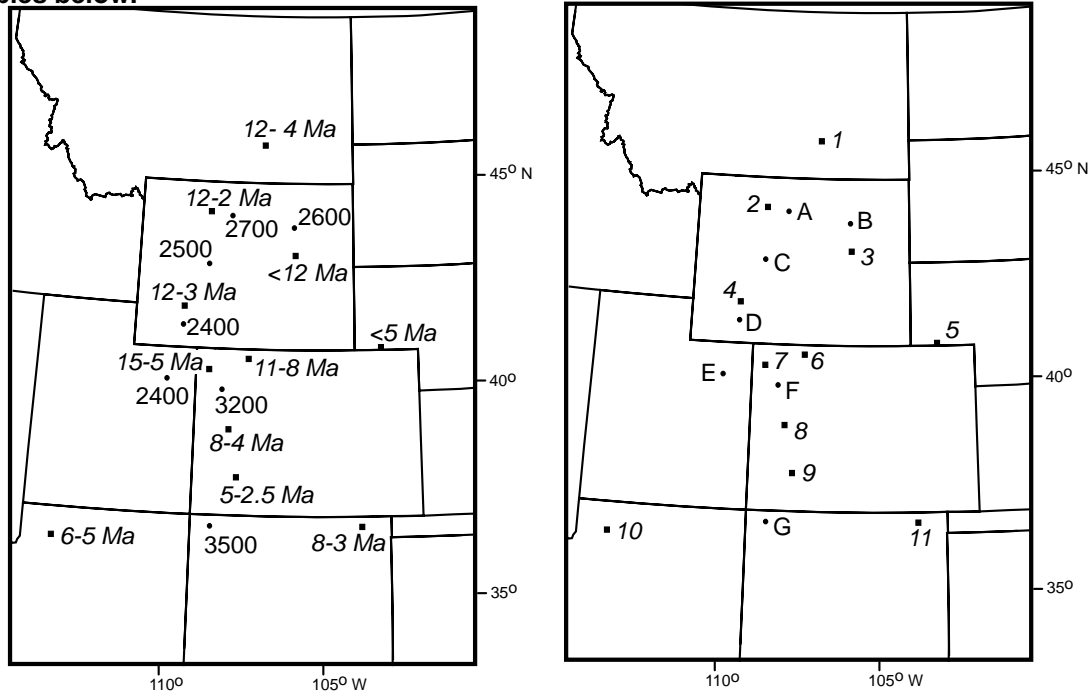

**Reconstructed surface elev.**

**This study: Other studies:**

|   | State | Location           | (meters) | (meters) | based on                       | References               |
|---|-------|--------------------|----------|----------|--------------------------------|--------------------------|
| A | WY    | Bighorn Basin      | 2400     | 2700     | vitrinite reflectance          | Hagen and Surdam, 1984   |
| B | WY    | Powder River Basin | 1900     | 2600     | fission track thermochronology | Naeser, N.D., 1992       |
| C | WY    | Wind River Basin   | 2100     | 2500     | vitrinite reflectance          | Nuccio and Finn, 1994    |
| D | WY    | Green River Basin  | 2300     | 2400     | reconstructed burial history   | Dickinson, 1989          |
| E | UT    | Uinta Basin        | 2300     | 2400     | fission track thermochronology | Pitman et al., 1982      |
| F | CO    | Piceance Basin     | 2200     | 3200     | vitrinite reflectance          | Nuccio and Johnson, 1990 |
| G | NM    | San Juan Basin     | 2800     | 3500     | reconstructed burial history   | Bond, 1984               |

**Age of highest, youngest marker**

**Age of lowest, oldest marker**

|    | State | Location                     | (based on)                | (based on)                   | References                                                           |
|----|-------|------------------------------|---------------------------|------------------------------|----------------------------------------------------------------------|
| 1  | MT    | North-central Montana        | 8-12 Ma (NALMA)           | 6-4 Ma (ash)                 | Tedford et al., 1987; Wayne et al., 1991                             |
| 2  | WY    | Bighorn Basin                | 8-12 Ma (NALMA)           | 2 Ma (pollen)                | McKenna and Love, 1972; Rohrer and Leopold, 1963                     |
| 3  | WY    | Powder River Basin           | 12 Ma (fission track age) | ?                            | Naeser, N.D., 1992                                                   |
| 4  | WY    | Green River Basin            | 8-12 Ma (NALMA)           | 3 Ma (volcanic flow)         | Dickinson, 1989; Lange et al., 2000                                  |
| 5  | NE    | Cheyenne Tablelands          | 5 Ma (ash)                | ?                            | Naeser, C.W. et al., 1980                                            |
| 6  | CO    | Elkhead Mountains            | 12 Ma (volcanic flow)     | 8 Ma (volcanic flow)         | Buffler, 2003; Segerstrom and Young, 1972; Snyder, 1980; Izett, 1975 |
| 7  | CO    | Piceance Basin               | 15 Ma (fission track age) | 5 Ma (fission track age)     | Nuccio and Johnson, 1990; Kelley and Blackwell, 1990                 |
| 8  | CO    | Western Colorado             | 8 Ma (volcanic flow)      | 4 Ma (volcanic flow)         | Larson et al., 1975; Izett, 1975; Kunk et al., 2002                  |
| 9  | CO    | San Juan Mountains           | 5 Ma (volcanic flow)      | 2.5 Ma (authigenic minerals) | Rye et al., 2000                                                     |
| 10 | AZ    | Western Grand Canyon         | 6 Ma (volcanic flow)      | 5 Ma (volcanic flow)         | McKee and McKee, 1972; Lucchitta, 1989                               |
| 11 | NM    | Raton-Clayton volcanic field | 8 Ma (volcanic flow)      | 3 Ma (volcanic flow)         | Stormer, 1972; Stroud, 1997                                          |

## DR1 – References cited

- Buffler, R.T., 1967, The Browns Park Formation and its relationships to the late Tertiary geologic history of the Elkhead region, northwestern Colorado - south central Wyoming [doctoral thesis]: University of California, Berkeley, 215 p.
- Chapin, C.E., and Cather, S.M., 1994, Tectonic setting of the axial basins of the northern and central Rio Grande Rift, *in* Keller, G.R. and Gather, S.M., eds., Basins of the Rio Grande Rift; structure, stratigraphy, and tectonic setting, Special Paper - Geological Society of America, vol.291, p. 5-25.
- Cooley, M.E., and Crist, M.A., 1981, Generalized fence diagram showing stratigraphy and potentiometric surface of the Tertiary formations in southeastern Wyoming and an adjacent part of Colorado: U.S. Geological Survey Miscellaneous Investigations Series Map I-1308, 1 sheet.
- Denson, N.M., and Harshman, E.N., 1969, Map showing areal distribution of Tertiary rocks, Bates Hole-Shirley Basin area, south-central Wyoming: U.S. Geological Survey Miscellaneous Geological Investigations Map 1-570, scale 1:125,000.
- Emry, R.J., 1973, Stratigraphy and preliminary biostratigraphy of the Flagstaff Rim area, Natrona County, Wyoming: Smithsonian Contributions to Paleobiology, no. 18, 43 p.
- Evanoff, E., 1990, Early Oligocene paleovalleys in southern and central Wyoming: evidence of high local relief on the late Eocene unconformity: *Geology*, v. 18, p. 443-446.
- Fassett, J. E., 1985, Early Tertiary paleogeography and paleotectonics of the San Juan basin area, NM and CO, *in* Flores, R.M. and Kaplan, S.S., eds., Cenozoic Paleogeography of the west-central United States: Rocky Mountain Paleogeography Symposium 3, SEPM, Rocky Mountain Section, p. 317-334.
- Flanagan, K.M., 1990, Late Cenozoic geology of the Pathfinder region, central Wyoming, with tectonic implications for adjacent areas [Ph.D. dissertation]: Laramie, University of Wyoming, 186 p.
- Gries, R., Dolson, J.C., and Reynolds, R.G.H., 1992, Structural and stratigraphic evolution and hydrocarbon distribution, Rocky Mountain foreland, *in* Macqueen, R.W. and Leckie, D.A., eds., Foreland basins and fold belts, AAPG Memoir, vol.55, p. 395-425.
- Gustavson, T.C., and Winkler, D.A., 1988, Depositional facies of the Miocene-Pliocene Ogallala Formation, northwestern Texas and eastern New Mexico: *Geology*, v. 19, p. 203-206.
- Hail, W.J., Jr., and Lewis, G.E., 1960, Probable late Miocene age of the North Park Formation in the North Park area, Colorado: Article 116, U. S. Geological Survey Professional Paper, Report: P 0400 B, p.259-260.
- Hansen, W.R., 1986, Neogene tectonics and geomorphology of the eastern Uinta Mountains in Utah, Colorado and Wyoming: USGS Professional Paper, v. 1356, p. 1-78.
- Harshman, E.N., 1972, Geology and uranium deposits, Shirley Basin area, Wyoming: U.S. Geological Survey Professional Paper 745, 82 p.
- Hawley, J.W., 1993, A review of the late Neogene stratigraphy of eastern New Mexico with emphasis on the Ogallala and Gatuna Formations: New Mexico Bureau of Mines and Mineral Resources, Open-file Report 392, 30 p.

- Honey, J.G., and Izett, G.A., 1988, Paleontology, taphonomy, and stratigraphy of the Browns Park Formation (Oligocene and Miocene) near Maybell, Moffat County, Colorado: U.S. Geological Survey Professional Paper 1358, 52 p.
- Howard, A.D., 1960, Cenozoic history of northeastern Montana and northwestern North Dakota with emphasis on the Pleistocene: U. S. Geological Survey Professional Paper P 0326.
- Kochel, R.C. and Ritter, D.R., 1982, Depositional environments of high-level sand and gravel deposits, western Bighorn Mountains, Wyoming: *Contributions to Geology*, v. 20, p. 111-122.
- Lillegraven, J.A., 1970, Stratigraphy, structure, and vertebrate fossils of the Oligocene Brule Formation, Slim Buttes, northwestern South Dakota: *Geological Society of America Bulletin*, v. 81, p. 831-850.
- Love, J.D., 1970, Cenozoic geology of the Granite Mountains area, central Wyoming: U. S. Geological Survey Professional Paper 495-C, 154 p
- Love, J.D., McKenna, M.C., and Dawson, M.R., 1976, Eocene, Oligocene, and Miocene rocks and vertebrate fossils at the Emerald Lake locality, 3 miles south of Yellowstone National Park, Wyoming: U.S. Geological Survey Professional Paper 932-b, 40 p.
- Martin, J.E., 1987, The White River Badlands of South Dakota, *in* Beus, S.S., ed., *Centennial field guide*, v. 6, Rocky Mountain section of the Geological Society of America, p. 233-236.
- McKenna, M.C. and Love, J.D., 1972, High-level strata containing early Miocene mammals on the Bighorn Mountains, Wyoming: *American Museum Novitates*, no. 2490, 31 p.
- Montagne, J., 1991, Cenozoic history of the Saratoga Valley area, Wyoming and Colorado: *University of Wyoming Contributions to Geology*, p. 13-70.
- Nations, D., Wilt, J.C., and Hevly, R.H., 1985, Cenozoic paleogeography of Arizona, *in* Flores, R.M. and Kaplan, S.S., eds., *Cenozoic paleogeography of the west-central United States*, Rocky Mountain Section, SEPM, Denver, CO, p. 335-355.
- Nuccio, V.F. and Finn, T.M., 1994, Structural and thermal history of the Paleocene Fort Union Formation, central and eastern Wind River Basin, with emphasis on petroleum potential of the Waltman Shale Member, *in* Flores, R.M., et al., eds., *Organics and the Rockies, Field Guide: Geological Survey of Wyoming*, Laramie, Wyoming, p. 53-68.
- Robinson, C.S., Mapel, W.J., and Bergendahl, M.H., 1964, Stratigraphy and structure of the northern and western flanks of the Black Hills uplift, Wyoming, Montana, and South Dakota: U.S. Geological Survey Professional Paper 404, 134 p.
- Scarborough, R.B., 1989, Cenozoic erosion and sedimentation in Arizona, *in* Jenney, J. P., and Reynolds, S.J., eds., *Geologic evolution of Arizona*, Tucson, Arizona Geological Society, v. 17, p. 515-537.
- Scott, G.R. and Taylor, R.B. 1975, Post-Paleocene Tertiary rocks and Quaternary volcanic ash of the Wet Mountain Valley, Colorado: U. S. Geological Survey Professional Paper, Report P 0868, 15 p.
- Scott, G.R., Taylor, R.B., Epis, R.C., and Wobus, R.A., 1978, Geologic map of the Pueblo 1 degrees by 2 degrees quadrangle, South-central Colorado: *Miscellaneous Investigations Series* - U. S. Geological Survey, Report: 1-1022, 2 sheets.



- Seeland, D., 1985, Oligocene paleogeography of the northern Great Plains and adjacent Mountains, *in* Flores, R. M., and Kaplan S. S., eds., *Cenozoic Paleogeography of West Central United States: Rocky Mountain Paleogeography Symposium 3*, SEPM, Rocky Mountain Section, p. 187-205.
- Sharps, J.A., 1980, Geologic map of the Limon 1 degrees by 2 degrees quadrangle, Colorado and Kansas, Miscellaneous Investigations Series, U. S. Geological Survey, Report: I-1250, 1 sheet.
- Staatz, M.H., 1983, Geology and description of thorium and rare-earth deposits in the southern Bear Lodge Mountains, northeastern Wyoming: U.S. Geological Survey Professional Paper 1049-D, 52 p.
- Steidteann, J.R., and Middleton, L.T., 1986, Eocene-Pliocene stratigraphy along the southern margin of the Wind River Range, Wyoming: revisions and implications from field and fission-track studies: *The Mountain Geologist*, v. 23, p. 19-25.
- Stone, W.J., 1973, Stratigraphy and sedimentary history of middle Cenozoic (Oligocene and Miocene) deposits in North Dakota [Ph.D. Thesis]: Grand Forks, ND, University of North Dakota, p. 217.
- Swinehart, J.B., Souders, V.L., DeGraw, H.M., and Diffendal, R.F., Jr., 1985, Cenozoic paleogeography of western Nebraska, *in* Flores, R.M., and Kaplan, S.S., eds., *Cenozoic paleogeography of the west-central United States: Society of Economic Paleontologists and Mineralogists, Rocky Mountain Section, Symposium*, v. 3, p. 209-229.
- Tweto, O., Moench, R.H., and Reed, J.C., Jr., 1978, Geologic map of the Leadville 1 degrees by 2 degrees quadrangle, northeastern Colorado: Miscellaneous Investigations Series - U. S. Geological Survey, Report 1-999, 1 sheet.
- Van Houten, F.B., 1964, Tertiary geology of the Beaver Rim area, Fremont and Natrona counties, Wyoming: U.S. Geological Survey Bulletin 1164, p. 1-99.

**DR2 – References cited for digital geologic and DEM data.**

- Green, G.N., 1992, The Digital Geologic Map of Colorado in ARC/INFO Format: U.S. Geological Survey Open-File Report 92-507, scale 1:500,000.
- Green, G.N. and Drouillard, P.H., 1994, The Digital Geologic Map of Wyoming in ARC/INFO Format: U.S. Geological Survey Open-File Report 94-0425, scale 1:500,000.
- Green, G. N., and Jones, G.E., 1997, The Digital Geologic Map of New Mexico in ARC/INFO Format: U.S. Geological Survey Open-File Report 97-0052, scale 1:500,000.
- Hintze, L.F., Willis, G.C., Laes, D.Y.M., Sprinkel, D.A., and Brown, K.D., 2000, Digital geologic map of Utah: Utah Geological Survey Map 179DM, scale 1:500,000.
- Hirschberg, D.M., and Pitts, G.S., 2000, Digital geologic map of Arizona: a digital database derived from the 1983 printing of the Wilson, Moore, and Cooper 1:500,000-scale map: U.S. Geological Survey Open-File Report 00-409, scale 1:500,000.
- Raines, G.L. and Johnson, B.R., 1996, Digital representation of the Montana state geologic map in ARC/INFO export format, U.S. Geological Survey Open-File Report 95-691, scale 1:500,000.
- Schruben, P. G., Arndt, R. E., Bawiec, W. J., 1994, Geology of the Conterminous United States at 1:2,500,000 Scale - A Digital Representation of the 1974 P.B. King and H.M. Beikman Map: U.S. Geological Survey Digital Data Series DDS-11, scale 1:2,500,000.
- U.S. Geological Survey, 1993, Digital elevation models, Data users guide 5, Reston, U.S. Geological Survey, p. 1-50.

### DR3 – References cited

- Bond, W.A., 1984, Application of Lopatin's method to determine burial history, evolution of the geothermal gradient, and timing of hydrocarbon generation in Cretaceous source rocks in the San Juan Basin, northwestern New Mexico and southwestern Colorado, *in* Woodward et al., eds., Hydrocarbon source rocks of the Greater Rocky Mountain region, Rocky Mountain Association of Geologists, Denver, CO, p. 433-447.
- Buffler, R.T., 2003, The Browns Park Formation in the Elkhead region, northwestern Colorado-south central Wyoming, *in* Reynolds, R.G., and Flores, R.M., eds., Implications for late Cenozoic sedimentation: Cenozoic Systems of the Rocky Mountain Region, Rocky Mountain Society for Economic Paleontologists and Mineralogists Special Paper.
- Dickinson, W.W., 1989, Analysis of vitrinite maturation and Tertiary burial history, northern Green River basin, Wyoming, *in* Law, B. E., and Spencer, C.W., eds., Geology of tight gas reservoirs in the Pinedale Anticline area, Wyoming, and at the Multiwell Experiment site: Colorado, U. S. Geological Survey Bulletin, p. F1-F13.
- Hagen, E. S., and Surdam, R. C., 1984, Maturation history and thermal evolution of Cretaceous source rocks of the Bighorn Basin, Wyoming and Montana, Hydrocarbon source rocks of the greater Rocky Mountain region: Rocky Mountain Association of Geologists, p. 321-338.
- Izett, G.A., 1975, Late Cenozoic sedimentation and deformation in northern Colorado and adjoining areas, *in* Curtis, B.F., ed., Cenozoic history of the Southern Rocky Mountains: Geological Society of America Memoir 144, p. 179-209.
- Kelley, S.A., and Blackwell, D.D., 1990, Thermal history of the Multi-Well Experiment (MWX) site, Piceance Creek basin, northwestern Colorado, determined from apatite fission-track analysis: Nuclear Tracks and Radiation Measurements, v. 17, p. 331-337.
- Kunk, M.J., Budahn, J.R., Unruh, D.M., Stanley, J.O., Kirkham, R.M., Bryant, B., Scott, R.B., Lidke, D.J., and Streufert, R.K., 2002,  $^{40}\text{Ar}/^{39}\text{Ar}$  ages of late Cenozoic volcanic rocks within and around the Carbondale and Eagle collapse centers, Colorado; constraints on the timing of evaporite-related collapse and incision of the Colorado River, *in* Kirkham, R.M., et al., eds., Late Cenozoic evaporite tectonism and volcanism in west-central Colorado: Boulder, Geological Society of America Special Paper, v. 366, p. 213-234.
- Lange, R. A., Carmichael, I. S. E., and Hall, C. M., 2000,  $^{40}\text{Ar}/^{39}\text{Ar}$  chronology of the Leucite Hills, Wyoming: Eruption rates, erosion rates, and an evolving temperature structure of the underlying mantle: Earth Planetary Science Letters, v. 174, p. 329-340.
- Larson, E.E., Ozima, M., and Bradley, W.C., 1975, Late Cenozoic volcanism in northwestern Colorado and its implications concerning tectonism and the origin of the Colorado River system, *in* Curtis, B.F., ed., Cenozoic history of the Southern Rocky Mountains: Geological Society of America Memoir 144, p. 155-178.

- Lucchitta, I., 1989, History of the Grand Canyon and of the Colorado River in Arizona, *in* Jenney, J. P. and Reynolds, S. J., eds., *Geologic Evolution of Arizona: Arizona Geological Society Digest 17*, p. 710-715.
- McKee, E. D., and McKee, E. H., 1972, Pliocene uplift of the Grand Canyon region-time of drainage adjustment: *Geological Society of America Bulletin*, v. 83, p. 1923-1932.
- McKenna, M.C. and Love, J.D., 1972, High-level strata containing early Miocene mammals on the Bighorn Mountains, Wyoming: *American Museum Novitates*, no. 2,490, 31 p.
- Naeser, N. D., 1992, Miocene cooling in the southwestern Powder River Basin, Wyoming - preliminary evidence from apatite fission-track analysis: *U.S. Geological Survey Bulletin*, 1917-0, p. 1-17.
- Naeser, C.W., Izett, G.A., and Obradovich, J.D., 1980, Fission-track and K-Ar ages of natural glasses: *U.S. Geological Survey Bulletin* 1489, 31 p.
- Nuccio, V. F. and Finn, T. M., 1994, Structural and thermal history of the Paleocene Fort Union Formation, central and eastern Wind River Basin, with emphasis on petroleum potential of the Waltman Shale Member, *in* Flores, R. M., Mehring, K.T., Jones, R. W., and Beck, T. L., eds., *Organics and the Rockies, Field Guide: Geological Survey of Wyoming, Laramie, Wyoming*, p. 53-68.
- Nuccio, V.F., and Johnson, R.C., 1990, Thermal history of selected coalbeds in the Upper Cretaceous Mesaverde Group and Tertiary Wasatch Formation, Multiwell Experiment Site, Colorado, in relation to hydrocarbon generation, *in* Law, B.E., and Spencer, C.W., eds., *Geology of Tight Gas Reservoirs in the Pinedale Anticline area, Wyoming, and the Multiwell Experiment Site, Colorado: U.S. Geological Survey, U.S. Geological Survey Bulletin* 1886, chap. L, p. L1-L8.
- Pitman, J.K., Fouch, T.D., and Goldhaber, M.B., 1982, Depositional setting and diagenetic evolution of some Tertiary unconventional reservoir rocks, Uinta Basin, Utah: *AAPG Bulletin* v. 66, p. 1581-1596.
- Rohrer, W.L. and Leopold, E.B., 1963, Fenton Pass Formation (Pleistocene?), Bighorn Basin, Wyoming: *U.S. Geological Survey Professional Paper*, 475-C, p. 45-48.
- Rye, R.O., Bethke, P.M., Lanphere, M.A., and Steven, T.A., 2000, Neogene geomorphic and climatic evolution of the central San Juan Mountains, Colorado; K/Ar age and stable isotope data on supergene alunite and jarosite from the Creede mining district, *in* Bethke, P.M. and Hay, R.L., eds., *Ancient Lake Creede; its volcano-tectonic setting, history of sedimentation, and relation to mineralization in the Creede mining district: Geological Society of America Special Paper*, v. 346, p.95-103.
- Segerstrom, K. and Young, E. J., 1972, General geology of the Hahans Peak and Farwell quadrangles, Routt County, Colorado: *U. S. Geological Survey Bulletin*, B 1349, 63 p.
- Snyder, G.L., 1980, Geologic map of the northernmost Park Range and southernmost Sierra Madre, Jackson and Routt counties, Colorado: *U. S. Geological Survey Miscellaneous Investigations Series, Report I- 1113*.
- Stormer, J. C., Jr., 1972, Ages and nature of volcanic activity on the Southern High Plains, New Mexico and Colorado: *Geology Society of American Bulletin*, v. 83, 2,443-2,448.

- Stroud, J.R., 1997, The geochronology of the Raton-Clayton volcanic field, with implications for volcanic history and landscape evolution, [M.S. thesis], New Mexico Institute of Mining and Technology, 116 p.
- Tedford, R. H., Skinner, M. F., Fields, R. W., Rensberger, J. M., Whistler, D. P., Galusha, T., Taylor, B. E., MacDonald, J. R., and Webb, S. D., 1987, Faunal succession and biochronology of the Arikareean through Hemphillian interval (late Oligocene through earliest Pliocene epochs) in North America, *in* Woodburne, M. O., Ed., *Cenozoic Mammals of North America, Geochronology and Biostratigraphy*: Berkeley, University of California Press, p. 153-210.
- Wayne, W.J., Aber, J S., Agard, S.S., Bergantino, R.N., Bluemle, J.P., Coates, D.A., Cooley, M.E., Madole, R.F., Martin, J.E., Mears, B., Jr., Morrison, R.B., and Sutherland, W.M., 1991, Quaternary Geology Of The Northern Great Plains, *in* Morrison, R.B., ed., *Quaternary nonglacial geology: conterminous U. S.*, Boulder, The Geology of North America, Vol K-2, The Geological Society of America, p. 441-476.
